# Supplementary material
Source: PubMed Central journal article supplement (PMC2427331)

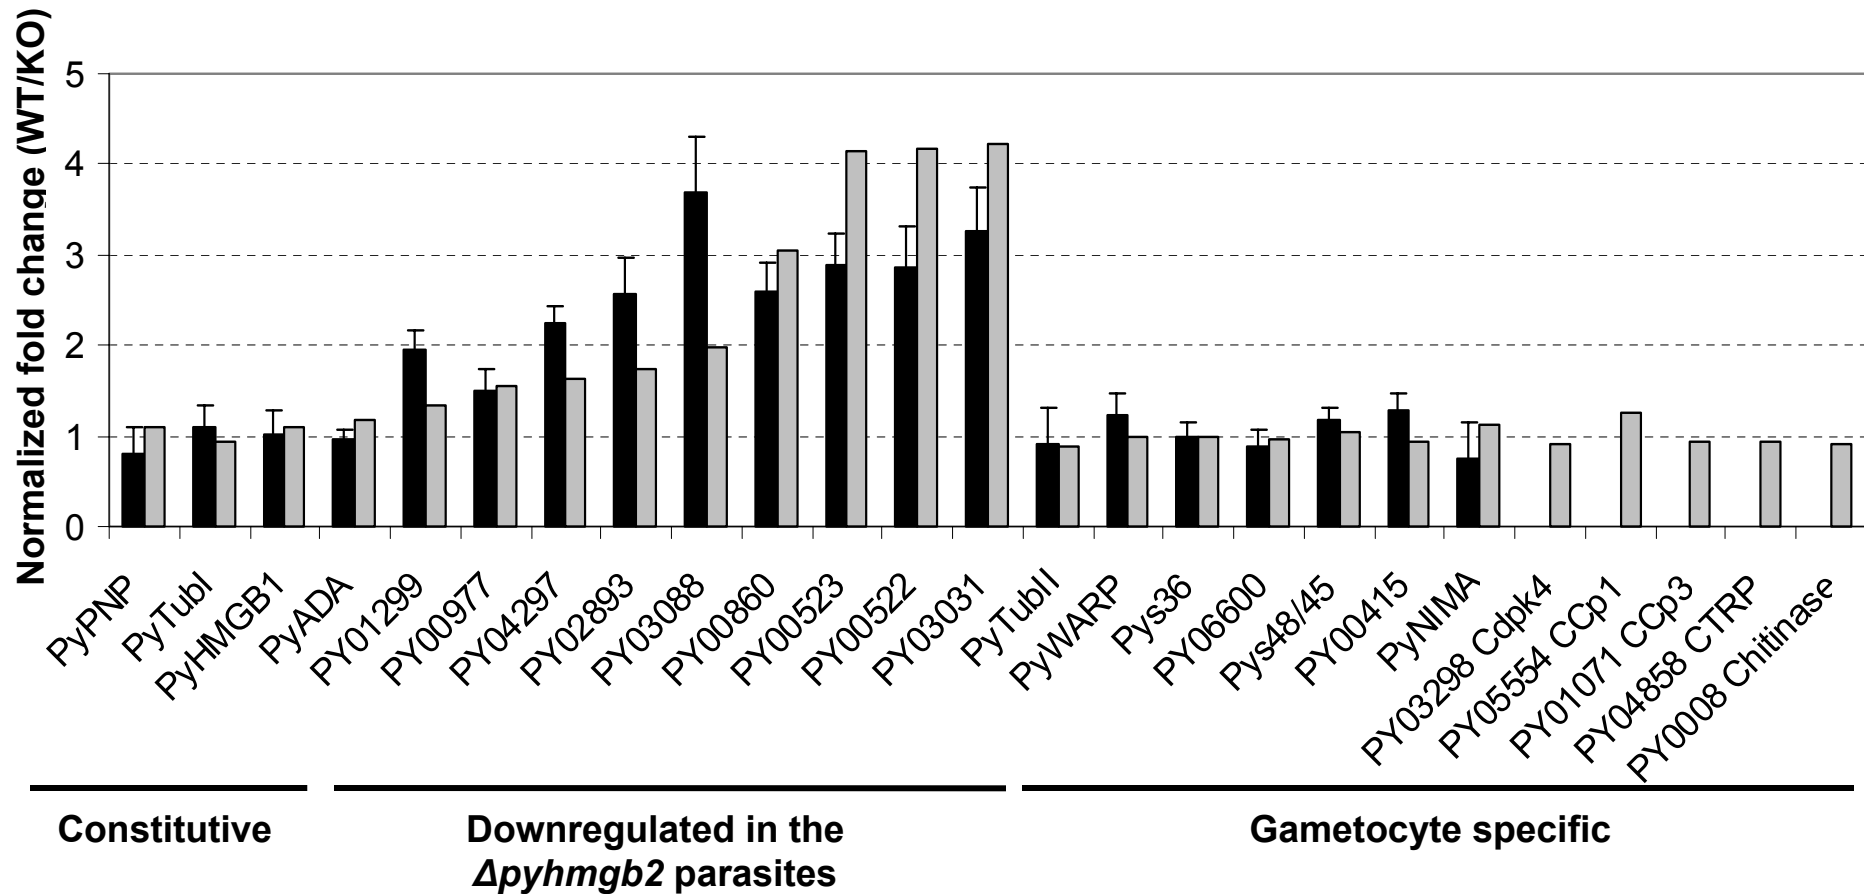

**Supplementary figure 1**

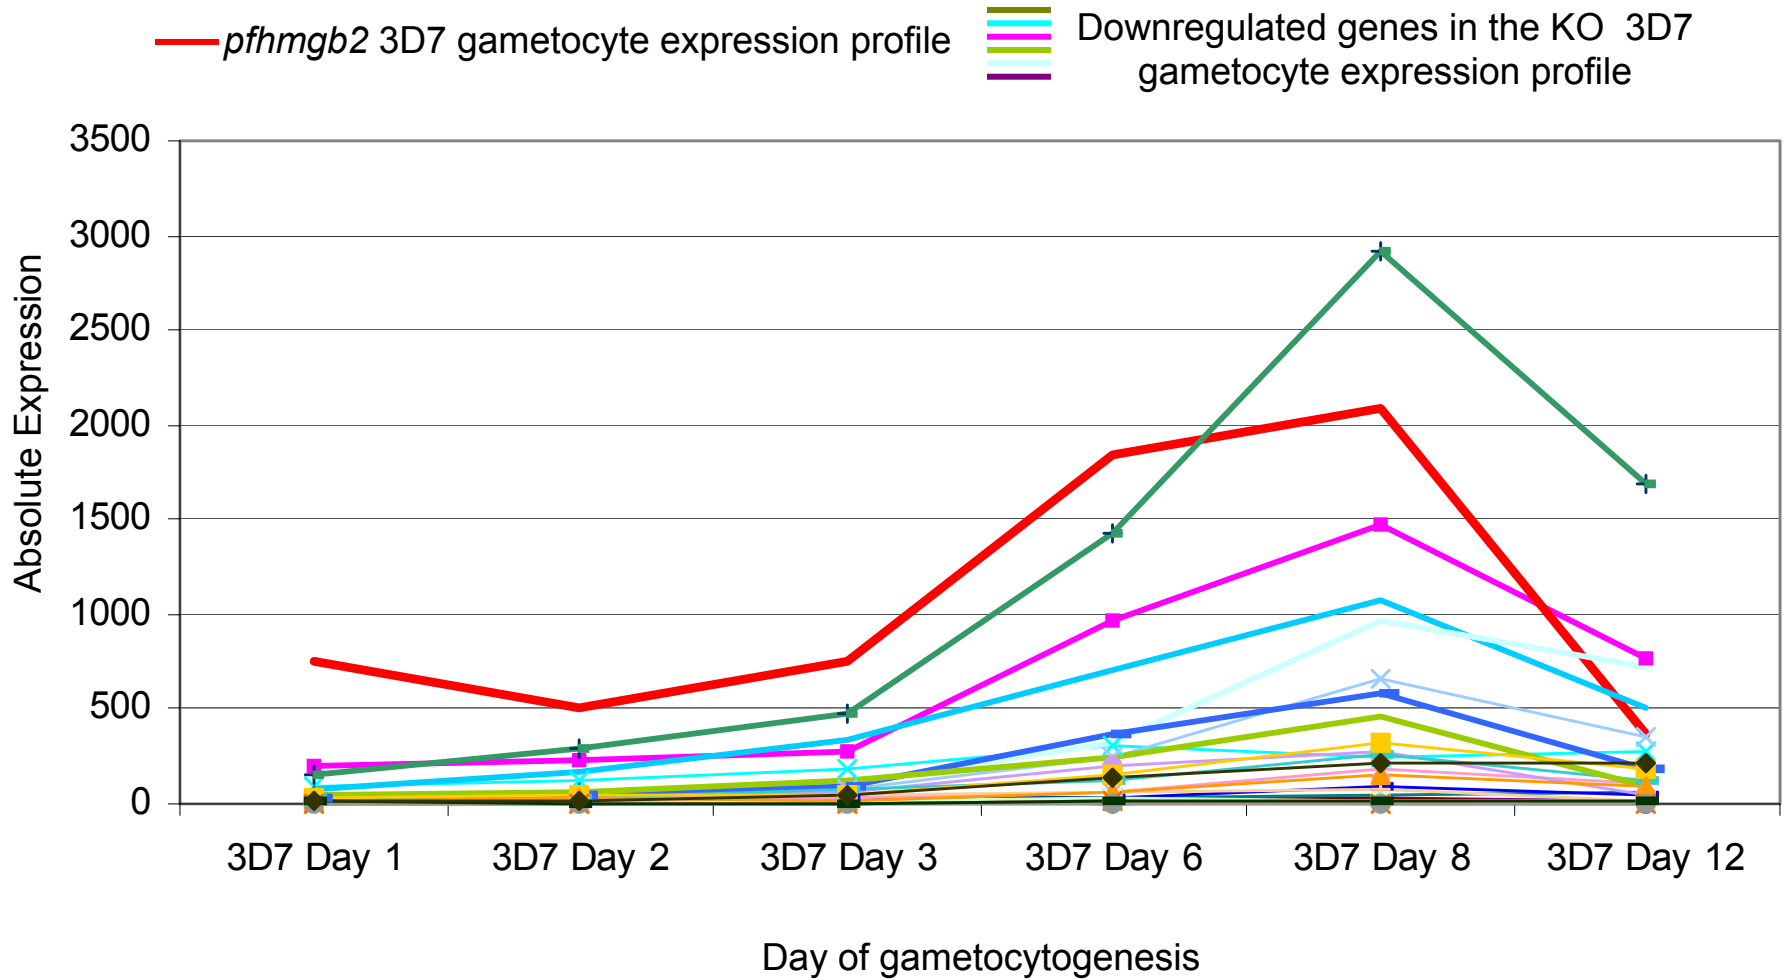

**Supplementary figure 2**

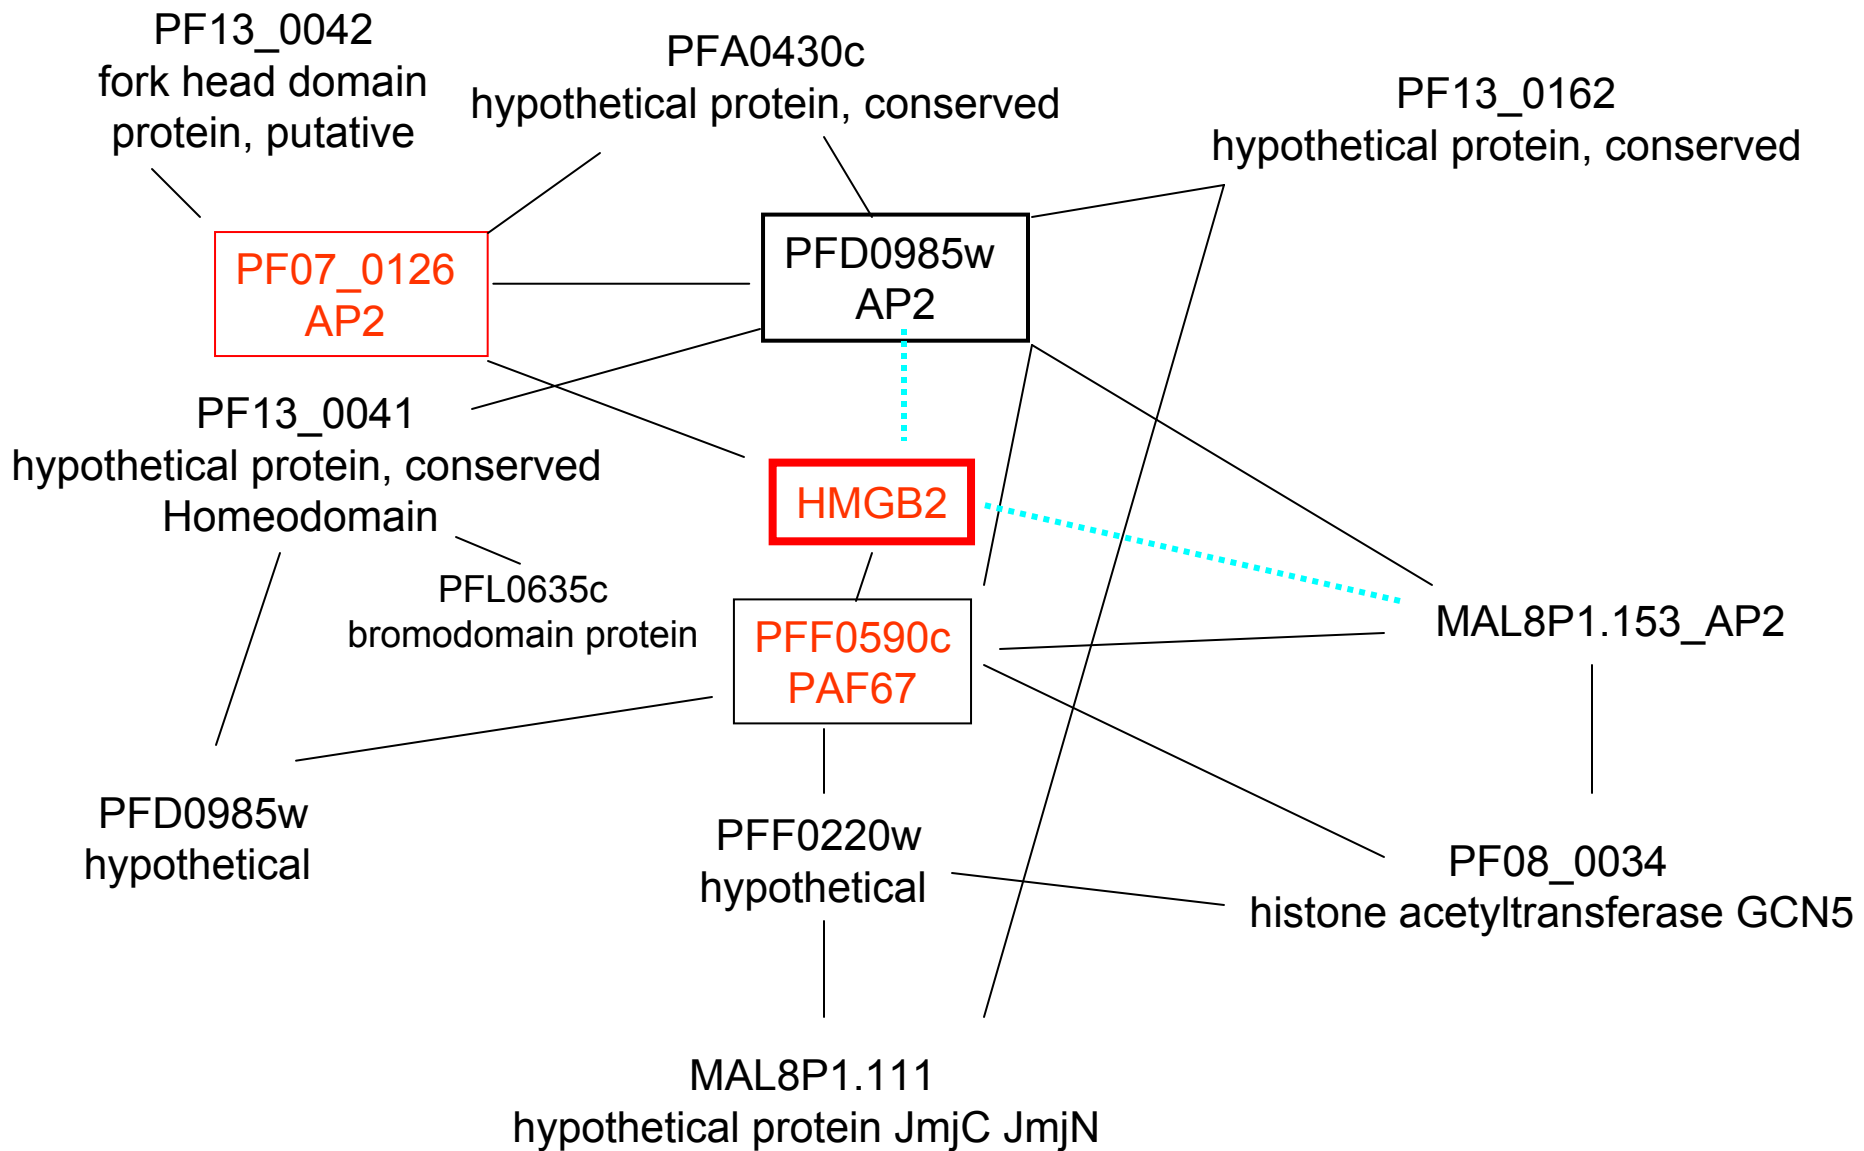

**Supplementary figure 3**

Supplement: M801637200_2.pdf [file M801637200_2.pdf]
